# Supplementary material for: Sugary Endosperm is Modulated by Starch Branching Enzyme IIa in Rice (Oryza sativa L.)
Source: PubMed Central journal article supplement (PMC5519516; doi:10.1186/s12284-017-0172-3), 2017-07-20

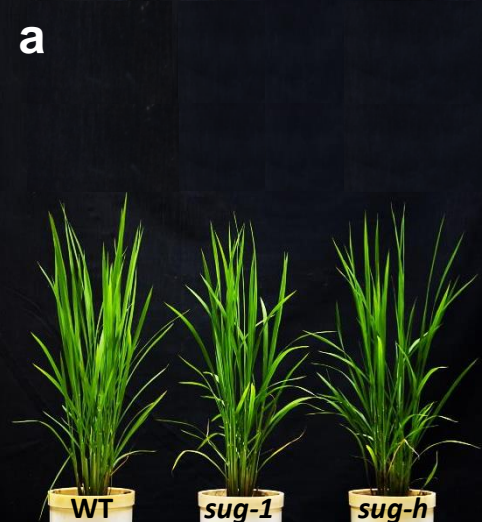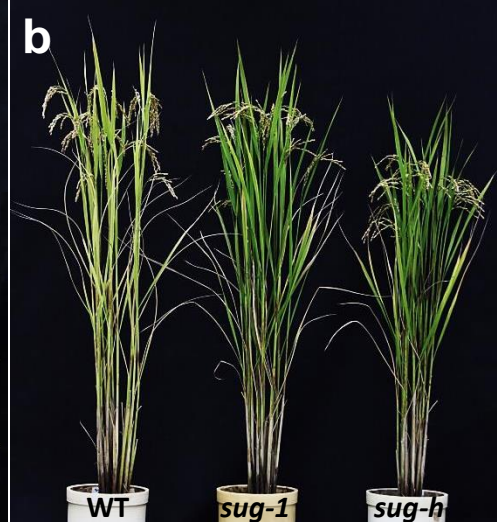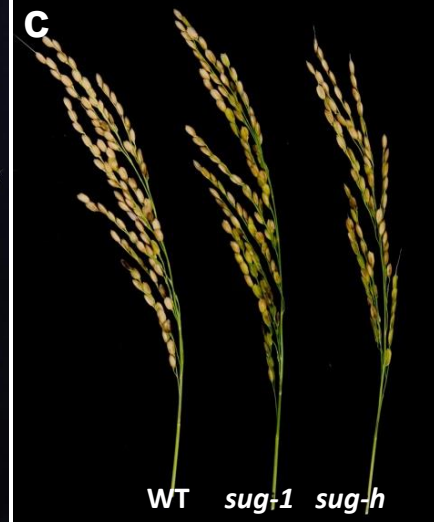

Supplement: 12284_2017_172_MOESM1_ESM.pdf [file 12284_2017_172_MOESM1_ESM.pdf]
