# Supplementary material for: Sugary Endosperm is Modulated by Starch Branching Enzyme IIa in Rice (Oryza sativa L.)
Source: PubMed Central journal article supplement (PMC5519516; doi:10.1186/s12284-017-0172-3), 2017-07-20
Supplement: 12284_2017_172_MOESM3_ESM.pdf [file 12284_2017_172_MOESM3_ESM.pdf]

sug-h 001 MASFAVSGA--RLGVVRAGGGGG--GGGGPAAARSGGVDLPSVLFRRKDSFSRQVIVSCAGAP  
WT 001 MASFAVSGA--RLGVVRAGGGGG--GGGGPAAARSGGVDLPSVLFRRKDSFSRQVIVSCAGAP  
Maize 001 MASFAVSGA--RLGVVRAGGGAR--SGGE--RRS-----AVDLESGLTVLSCAGAP  
Sorghum 001 MASFAVSGAGARLGVVREGGSSAR--SGGG--RRRSRGGVDLPSVLFRRKDAISRTVLSAGAP  
Barley 001 MAIFAVSGA--TLGVVRAAGG--ALPRSSERRGGDLPSLLLRKDKDSRAVLSCAAP  
Wheat 001 MAIFAVSGA--TLGVVRAEAGAGGGLLPRSSERRGGVDLPSLLLRKDKDSRAVLSCAASP

sug-h 058 GKVLPVGGGSDLLSSAEPDVEVTEQEQPEESQIPDDNKVKPFEFEFEIIPAVAEASIKVVAE  
WT 058 GKVLPVGGGSDLLSSAEPDVEVTEQEQPEESQIPDDNKVKPFEFEFEIIPAVAEASIKVVAE  
Maize 045 GKVLPVGGGSDLLSSAEPVVDVTEQPEELQIPDAEQVVEEKAYSSAAQATSAAAEESGV  
Sorghum 058 GKVLPVGGGSDLLSSAEPVVDVTEQPEELQIPDAEQVVEEKAYSSAAQATSAAAEES--  
Barley 056 GKVLPVGGGSDLLSAAEPQPEELQVPEDEIEEMAEVNMVGGAAEKLESSEPTQGIET--  
Wheat 059 GKVLPVGGGSDLLSAAEPQPEELQVPEDEIEEQTAEVNMTGGTAEKLESSEPTQGIET--

sug-h 118 EKLESSEVIQDIEN----VTEGVIKDADEPTVEIDKPRVIPPVGGDQKIYQIDPMLGEF  
WT 118 EKLESSEVIQDIEN----VTEGVIKDADEPTVEIDKPRVIPPVGGDQKIYQIDPMLGEF  
Maize 103 EAEERPELSEVIGVGGTGGTKIDGAGIKAKAPVVEEKPRVIPPVGGDQKIYQIYEDPMLGEF  
Sorghum 116 -----SEVDAAIKAKAPVVEEKPRVIPPVGGDQKIYQIYEDPMLGEF  
Barley 114 -----ITDGVTKGVKELVVGKEKPVVPPKPGDQKIYQIYEDPMLKDF  
Wheat 116 -----ITDGVTKGVKELVVGKEKPRVIPPVGGDQKIYQIYEDPMLKDF

E\_set\_GBE\_euk\_N

sug-h 173 RNHLDYRYSEYKRMRAAIDQHEGGLDAFSRGEKLGFTRSAEGITYREWAPGASAAALVG  
WT 173 RNHLDYRYSEYKRMRAAIDQHEGGLDAFSRGEKLGFTRSAEGITYREWAPGASAAALVG  
Maize 163 RGHLDYRYSEYKRRRAAIDQHEGGLDAFSRGEKLGFTRSAEGITYREWAPGASAAALVG  
Sorghum 156 RGHLDYRYSEYKRMRAAIDQHEGGLDAFSRGEKLGFTRSAEGITYREWAPGASAAALVG  
Barley 154 RSHLDYRYSEYKRRRAAIDQHEGGLDAFSRGEKLGFTRSAEGITYREWAPGASAAALVG  
Wheat 156 RSHLDYRYSEYKRRRAAIDQHEGGLDAFSRGEKLGFTRSAEGITYREWAPGASAAALVG

sug-h 233 DFNNWNPNADTMTRNEYGVWEISLFPNNADGSPAIPHGSRVKIRMDTPSGVKDISPAWIKF  
WT 233 DFNNWNPNADTMTRNEYGVWEISLFPNNADGSPAIPHGSRVKIRMDTPSGVKDISPAWIKF  
Maize 223 DFNNWNPNADAMARNEYGVWEIFLFPNNADGSPAIPHGSRVKIRMDTPSGVKDISPAWIKF  
Sorghum 216 DFNNWNPNADAMTRNEYGVWEIFLFPNNADGSPAIPHGSRVKIRMDTPSGVKDISPAWIKF  
Barley 214 DFNNWNPNADTMTRDIIYGVWEIFLFPNNADGSPAIPHGSRVKIRMDTPSGVKDISPAWIKF  
Wheat 216 DFNNWNPNADTMTRDIIYGVWEIFLFPNNADGSPAIPHGSRVKIRMDTPSGVKDISPAWIKF

AmyAc\_bac\_euk\_BE

sug-h 293 AVQAPGEIPYNGIYYDPPEEEKYVFQHPQKRPNSLRITYESHIGMSSPEPKINTYANFRD  
WT 293 AVQAPGEIPYNGIYYDPPEEEKYVFQHPQKRPNSLRITYESHIGMSSPEPKINTYANFRD  
Maize 283 SVQAPGEIPYNGIYYDPPEEEKYVFKHPQKRPKSLRITYESHIGMSSPEPKINTYANFRD  
Sorghum 276 SVQAPGEIPYNGIYYDPPEEEKYVFKHPQKRPKSLRITYESHIGMSSPEPKINTYANFRD  
Barley 274 SVQAPGEIPYNGIYYDPPEEEKYVFQHPQKRPNSLRITYESHIGMSSPEPKINTYANFRD  
Wheat 276 SVQAPGEIPYNGIYYDPPEEEKYVFQHPQKRPNSLRITYESHIGMSSPEPKINTYANFRD

sug-h 353 EVLPRIKRLGYNNAVQIMAIQEHSHYASFGYHVTNFFAPSSRFGTPEDLKSLIDKAHELGL  
WT 353 EVLPRIKRLGYNNAVQIMAIQEHSHYASFGYHVTNFFAPSSRFGTPEDLKSLIDKAHELGL  
Maize 343 EVLPRIKRLGYNNAVQIMAIQEHSHYASFGYHVTNFFAPSSRFGTPEDLKSLIDKAHELGL  
Sorghum 336 EVLPRIKRLGYNNAVQIMAIQEHSHYASFGYHVTNFFAPSSRFGTPEDLKSLIDKAHELGL  
Barley 334 EVLPRIKRLGYNNAVQIMAIQEHSHYASFGYHVTNFFAPSSRFGTPEDLKSLIDKAHELGL  
Wheat 336 EVLPRIKRLGYNNAVQIMAIQEHSHYASFGYHVTNFFAPSSRFGTPEDLKSLIDKAHELGL

sug-h 413 LVLMDIVHSHASNNTLDGLNGFDGTDTHYFHGGPRGHMWD SRLFNYSWEVLRLLSN  
WT 413 LVLMDIVHSHASNNTLDGLNGFDGTDTHYFHGGPRGHMWD SRLFNYSWEVLRLLSN  
Maize 403 LVLMDIVHSHASNNTLDGLNGFDGTDTHYFHGGPRGHMWD SRLFNYSWEVLRLLSN  
Sorghum 396 LVLMDIVHSHASNNTLDGLNGFDGTDTHYFHGGPRGHMWD SRLFNYSWEVLRLLSN  
Barley 394 LVLMDIVHSHASNNTLDGLNGFDGTDTHYFHGGPRGHMWD SRLFNYSWEVLRLLSN  
Wheat 396 LVLMDIVHSHASNNTLDGLNGFDGTDTHYFHGGPRGHMWD SRLFNYSWEVLRLLSN

sug-h 473 ARWWLEEKYKFDGFRFDGVTSMYTHHGLQVAFVTFGNNGEYFGFATDVAVVYLMVNDLIIH  
WT 473 ARWWLEEKYKFDGFRFDGVTSMYTHHGLQVAFVTFGNNGEYFGFATDVAVVYLMVNDLIIH  
Maize 463 ARWWLEEKYKFDGFRFDGVTSMYTHHGLQVAFVTFGNNGEYFGFATDVAVVYLMVNDLIIH  
Sorghum 456 ARWWLEEKYKFDGFRFDGVTSMYTHHGLQVAFVTFGNNGEYFGFATDVAVVYLMVNDLIIH  
Barley 454 ARWWLEEKYKFDGFRFDGVTSMYTHHGLQVAFVTFGNNGEYFGFATDVAVVYLMVNDLIIH  
Wheat 456 ARWWLEEKYKFDGFRFDGVTSMYTHHGLQVAFVTFGNNGEYFGFATDVAVVYLMVNDLIIH

\*

sug-h 533 GLYPEAVSIGEDVSGMPTFCIPVQDGGVGFYRLHMAVPDKWIELLKQSDSEYWKMGDIVH  
WT 533 GLYPEAVSIGEDVSGMPTFCIPVQDGGVGFYRLHMAVPDKWIELLKQSDSEYWKMGDIVH  
Maize 523 GLYPEAVSIGEDVSGMPTFCIPVQDGGVGFYRLHMAVPDKWIELLKQSDSEYWKMGDIVH  
Sorghum 516 GLYPEAVSIGEDVSGMPTFCIPVQDGGVGFYRLHMAVPDKWIELLKQSDSEYWKMGDIVH  
Barley 514 GLYPEAVSIGEDVSGMPTFCIPVQDGGVGFYRLHMAVPDKWIELLKQSDSEYWKMGDIVH  
Wheat 516 GLYPEAVSIGEDVSGMPTFCIPVQDGGVGFYRLHMAVPDKWIELLKQSDSEYWKMGDIVH

sug-h 593 TLTNRRWSEKCVTYAESHDQALVGDKTIAFWLMDKDMYDFMALDRPSTPRI DRGIALHMK  
WT 593 TLTNRRWSEKCVTYAESHDQALVGDKTIAFWLMDKDMYDFMALDRPSTPRI DRGIALHMK  
Maize 583 TLTNRRWLEKCVTYAESHDQALVGDKTIAFWLMDKDMYDFMALDRPSTPRI DRGIALHMK  
Sorghum 576 TLTNRRWLEKCVTYAESHDQALVGDKTIAFWLMDKDMYDFMALDRPSTPRI DRGIALHMK  
Barley 574 TLTNRRWLEKCVTYAESHDQALVGDKTIAFWLMDKDMYDFMALDRPSTPRI DRGIALHMK  
Wheat 576 TLTNRRWLEKCVTYAESHDQALVGDKTIAFWLMDKDMYDFMALDRPSTPRI DRGIALHMK

Alpha-amylase\_C

sug-h 713 ADYLRYRGMQEFDQAMQHLEEKYGFMTSEHQYVSRKHEEDKVIIFERGLVVFVNFHWSN  
WT 713 ADYLRYRGMQEFDQAMQHLEEKYGFMTSEHQYVSRKHEEDKVIIFERGLVVFVNFHWSN  
Maize 703 ADYLRYRGMQEFDQAMQHLEEKYGFMTSEHQYVSRKHEEDKVIIFERGLVVFVNFHWSN  
Sorghum 696 ADYLRYRGMQEFDQAMQHLEEKYGFMTSEHQYVSRKHEEDKVIIFERGLVVFVNFHWSN  
Barley 694 ADYLRYRGMQEFDQAMQHLEEKYGFMTSEHQYVSRKHEEDKVIIFERGLVVFVNFHWSN  
Wheat 696 ADYLRYRGMQEFDQAMQHLEEKYGFMTSEHQYVSRKHEEDKVIIFERGLVVFVNFHWSN

sug-h 773 SYFDYRVGCIKPGKYKIVLDSDDGLFGGFSRLDHDAEYFTADWPHDNRPCSFVYTPSRT  
WT 773 SYFDYRVGCIKPGKYKIVLDSDDGLFGGFSRLDHDAEYFTADWPHDNRPCSFVYTPSRT  
Maize 763 SYFDYRVGCIKPGKYKIVLDSDDGLFGGFSRLDHDAEYFTADWPHDNRPCSFVYTPSRT  
Sorghum 756 SYFDYRVGCIKPGKYKIVLDSDDGLFGGFSRLDHDAEYFTADWPHDNRPCSFVYTPSRT  
Barley 754 SYFDYRVGCIKPGKYKIVLDSDDGLFGGFSRLDHDAEYFTADWPHDNRPCSFVYTPSRT  
Wheat 756 SYFDYRVGCIKPGKYKIVLDSDDGLFGGFSRLDHDAEYFTADWPHDNRPCSFVYTPSRT

sug-h 833 AVVYALTEFDZ--  
WT 833 AVVYALTEFDZ--  
Maize 823 AVVYAPAGAEDE  
Sorghum 816 AVVYAPAGAEDE  
Barley 814 AVVYALTEFDZ--  
Wheat 816 AVVYALTEFDZ--
